# Supplementary material for: g-C3N4 synthesized from NH4SCN in a H2 atmosphere as a high performance photocatalyst for blue light-driven degradation of rhodamine B
Source: Royal Society of Chemistry journal article supplement (doi:10.1039/d0ra02454f), 2020-01-01
Supplement: d0ra02454f1.pdf [file d0ra02454f1.pdf]

Table S1 The specific surface area ( $S_{\text{BET}}$ ,  $\text{m}^2\text{g}^{-1}$ ), total pore volume ( $V_{\text{pore}}$ ,  $\text{cm}^3\text{g}^{-1}$ ), and BJH average pore width ( $D_{\text{pore}}$ , nm) of the prepared samples

| Sample                    | Specific surface area ( $S_{\text{BET}}$ , $\text{m}^2\text{g}^{-1}$ ) | BJH Cumulative pore volume ( $V_{\text{pore}}$ , $\text{cm}^3\text{g}^{-1}$ ) | BJH Average pore width ( $D_{\text{pore}}$ , nm) |
|---------------------------|------------------------------------------------------------------------|-------------------------------------------------------------------------------|--------------------------------------------------|
| AT-H <sub>2</sub> -550-1  | 24.0479                                                                | 0.1323                                                                        | 17.18                                            |
| AT-H <sub>2</sub> -550-2  | 26.7601                                                                | 0.1557                                                                        | 17.60                                            |
| AT-H <sub>2</sub> -550-3  | 32.5350                                                                | 0.2780                                                                        | 23.51                                            |
| AT-H <sub>2</sub> -550-4  | 40.3711                                                                | 0.2870                                                                        | 20.97                                            |
| AT-H <sub>2</sub> -550-5  | 65.8849                                                                | 0.3874                                                                        | 19.46                                            |
| AT-H <sub>2</sub> -400-5  | 3.0977                                                                 | 0.0224                                                                        | 18.36                                            |
| AT-H <sub>2</sub> -450-5  | 40.5149                                                                | 0.3063                                                                        | 22.49                                            |
| AT-H <sub>2</sub> -500-5  | 54.1686                                                                | 0.4566                                                                        | 24.19                                            |
| AT-H <sub>2</sub> -550-5  | 65.8849                                                                | 0.3874                                                                        | 19.46                                            |
| AT-CH <sub>4</sub> -550-5 | 13.6830                                                                | 0.1395                                                                        | 23.15                                            |
| AT-CO-550-5               | 16.5323                                                                | 0.1775                                                                        | 24.27                                            |
| AT-Ar-550-5               | 20.5713                                                                | 0.1293                                                                        | 18.45                                            |
| AT-H <sub>2</sub> -550-5  | 65.8849                                                                | 0.3874                                                                        | 19.46                                            |
| T-H <sub>2</sub> -550-5   | 54.7424                                                                | 0.3577                                                                        | 20.10                                            |
| D-H <sub>2</sub> -550-5   | 23.9363                                                                | 0.1479                                                                        | 16.96                                            |
| M-H <sub>2</sub> -550-5   | 24.5017                                                                | 0.1579                                                                        | 17.39                                            |
| AT-H <sub>2</sub> -550-5  | 65.8849                                                                | 0.3874                                                                        | 19.46                                            |

Table S2 The C, H, N, S elemental analysis data and C/N molar ratio of the samples

| Sample                     | m%     |        |       |       | n%    |       |       |       | (n/n) |
|----------------------------|--------|--------|-------|-------|-------|-------|-------|-------|-------|
|                            | C      | N      | H     | S     | C     | N     | H     | S     | C/N   |
| AT-H <sub>2</sub> -400-5   | 32.070 | 60.400 | 2.319 | 1.286 | 2.670 | 4.312 | 2.301 | 0.040 | 0.619 |
| AT-H <sub>2</sub> -450-5   | 33.510 | 58.920 | 2.312 | 0     | 2.790 | 4.207 | 2.294 | 0.000 | 0.663 |
| AT-H <sub>2</sub> -500-5   | 34.175 | 59.370 | 2.387 | 0     | 2.845 | 4.239 | 2.368 | 0.000 | 0.671 |
| AT-H <sub>2</sub> -550-5   | 35.215 | 60.895 | 2.567 | 0     | 2.932 | 4.348 | 2.547 | 0.000 | 0.674 |
| AT-H <sub>2</sub> -550-1   | 35.050 | 61.420 | 2.030 | 0     | 2.918 | 4.385 | 2.014 | 0.000 | 0.665 |
| AT-H <sub>2</sub> -550-2   | 34.470 | 61.305 | 2.248 | 0     | 2.870 | 4.377 | 2.230 | 0.000 | 0.656 |
| AT-H <sub>2</sub> -550-3   | 34.680 | 61.345 | 2.018 | 0     | 2.887 | 4.380 | 2.002 | 0.000 | 0.659 |
| AT-H <sub>2</sub> -550-4   | 34.345 | 61.370 | 2.352 | 0     | 2.860 | 4.381 | 2.333 | 0.000 | 0.653 |
| AT-H <sub>2</sub> -550-5   | 35.215 | 60.895 | 2.567 | 0     | 2.932 | 4.348 | 2.547 | 0.000 | 0.674 |
| AT- CH <sub>4</sub> -550-5 | 34.545 | 61.295 | 1.649 | 0     | 2.876 | 4.376 | 1.636 | 0.000 | 0.657 |
| AT- CO -550-5              | 34.530 | 61.480 | 2.245 | 0     | 2.875 | 4.389 | 2.227 | 0.000 | 0.655 |
| AT- Ar -550-5              | 34.540 | 61.435 | 1.866 | 0     | 2.876 | 4.386 | 1.851 | 0.000 | 0.656 |
| AT-H <sub>2</sub> -550-5   | 35.215 | 60.895 | 2.567 | 0     | 2.932 | 4.348 | 2.547 | 0.000 | 0.674 |
| D-H <sub>2</sub> -550-5    | 35.045 | 62.615 | 1.571 | 0     | 2.918 | 4.470 | 1.559 | 0.000 | 0.653 |
| M-H <sub>2</sub> -550-5    | 35.190 | 62.860 | 1.955 | 0     | 2.930 | 4.488 | 1.940 | 0.000 | 0.653 |
| T-H <sub>2</sub> -550-5    | 35.730 | 62.095 | 2.158 | 0     | 2.975 | 4.433 | 2.141 | 0.000 | 0.671 |
| AT-H <sub>2</sub> -550-5   | 35.215 | 60.895 | 2.567 | 0     | 2.932 | 4.348 | 2.547 | 0.000 | 0.674 |
